# Supplementary material for: CDK5RAP2 is a Wnt target gene and promotes stemness and progression of oral squamous cell carcinoma
Source: PubMed Central journal article supplement (PMC9922250; doi:10.1038/s41419-023-05652-z), 2023-02-11
Supplement: 41419_2023_5652_MOESM1_ESM.pdf [file 41419_2023_5652_MOESM1_ESM.pdf]

## Supplementary Figure 1

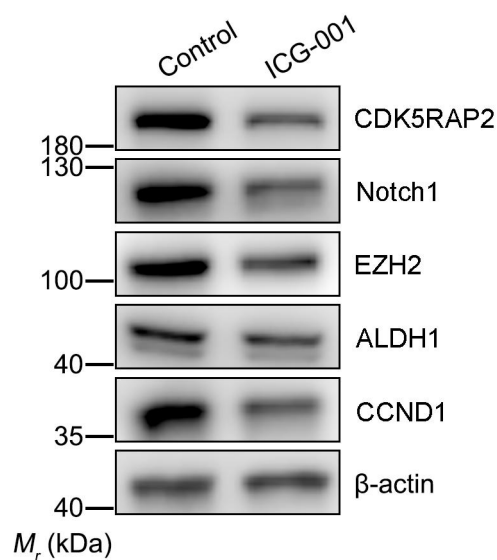

**Supplementary Figure 1. Downregulation of CSC markers by treatment with ICG-001.** HOK cells were treated with 25  $\mu$ M ICG-001 for 24 h and cell lysates were then immunoblotted with the indicated antibodies.

## Supplementary Figure 2

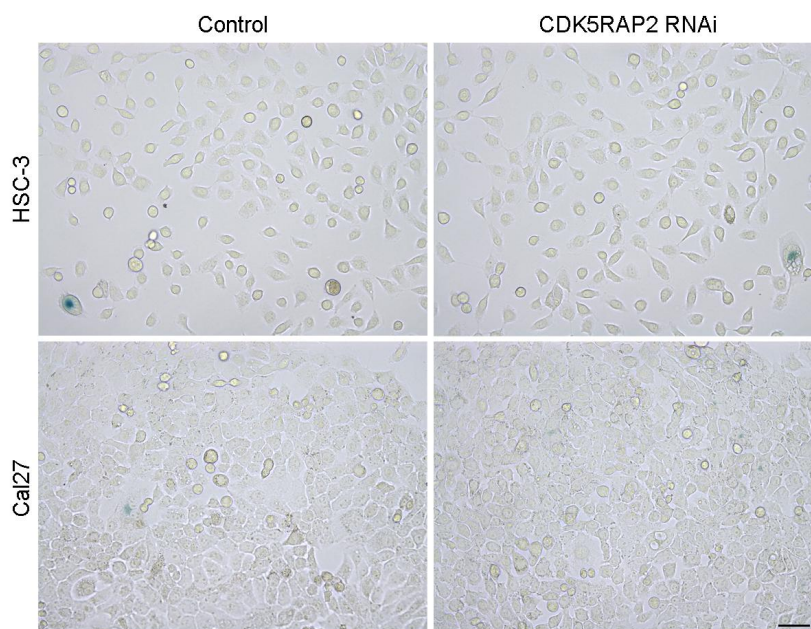

**Supplementary Figure 2. Knockdown of CDK5RAP2 does not induce cellular senescence in OSCC cells.** Cellular senescence was determined by  $\beta$ -galactosidase staining using control and stable CDK5RAP2-knockdown Cal27 and HSC-3 cells. Shown are representative images. Scale bar, 50  $\mu$ m.

### Supplementary Figure 3

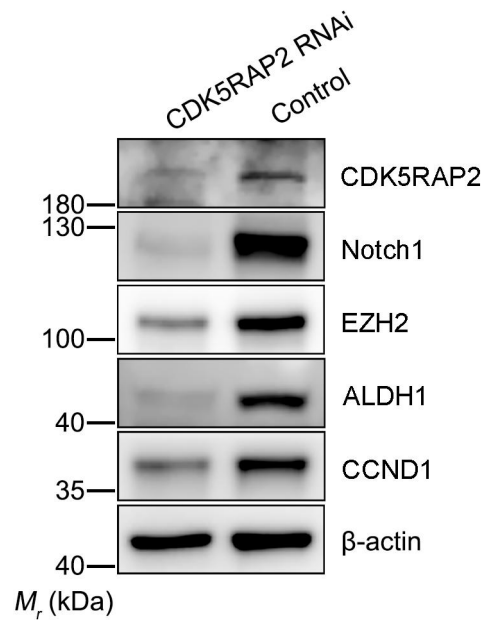

**Supplementary Figure 3. Downregulation of CSC markers by CDK5RAP2 knockdown.** Control and stable CDK5RAP2-knockdown Cal27 cells were lysed and immunoblotted for CSC markers.
