# Supplementary material for: CDK5RAP2 is a Wnt target gene and promotes stemness and progression of oral squamous cell carcinoma
Source: PubMed Central journal article supplement (PMC9922250; doi:10.1038/s41419-023-05652-z), 2023-02-11

Original Western blots of Figure 2

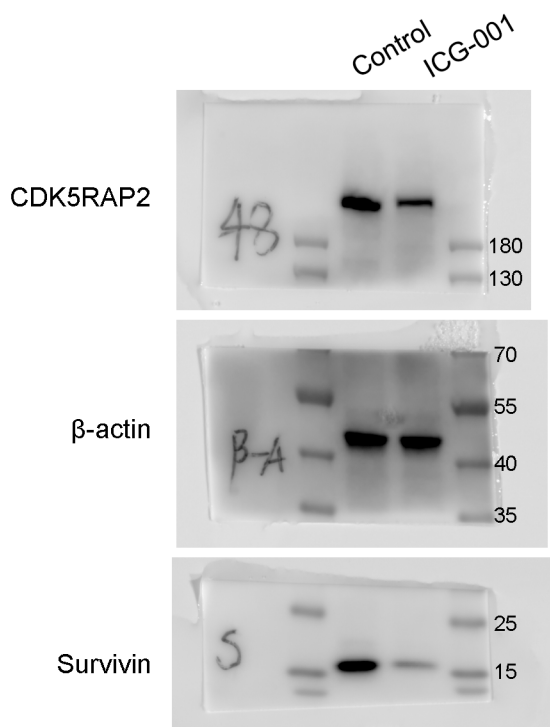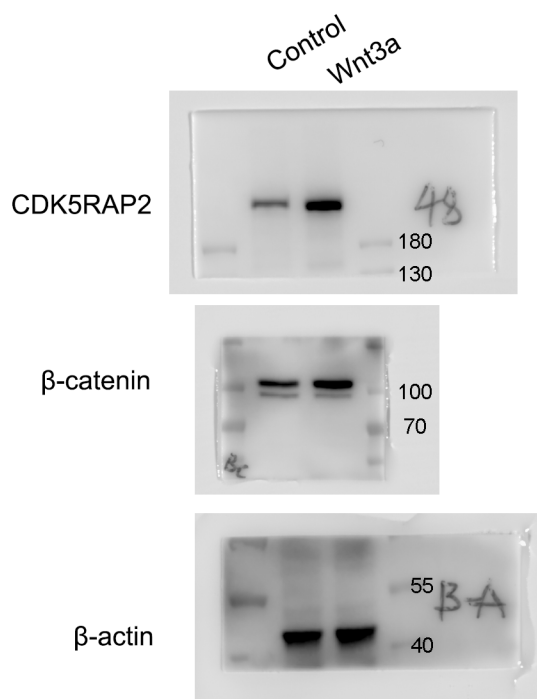

Original Western blots of Supplementary Figure 1

Original Western blots of Figure 3

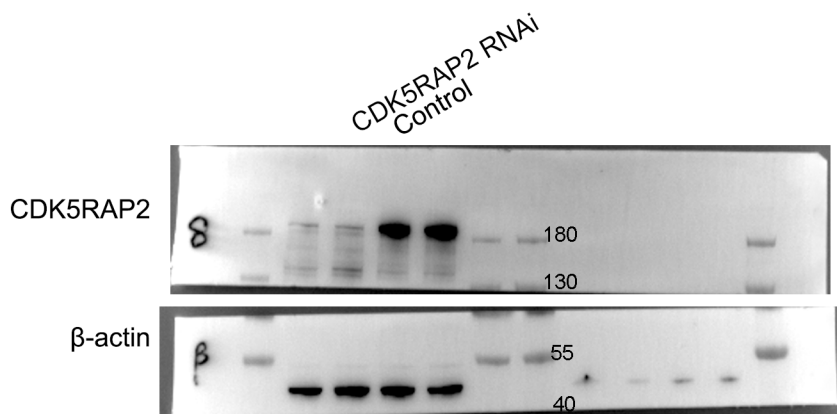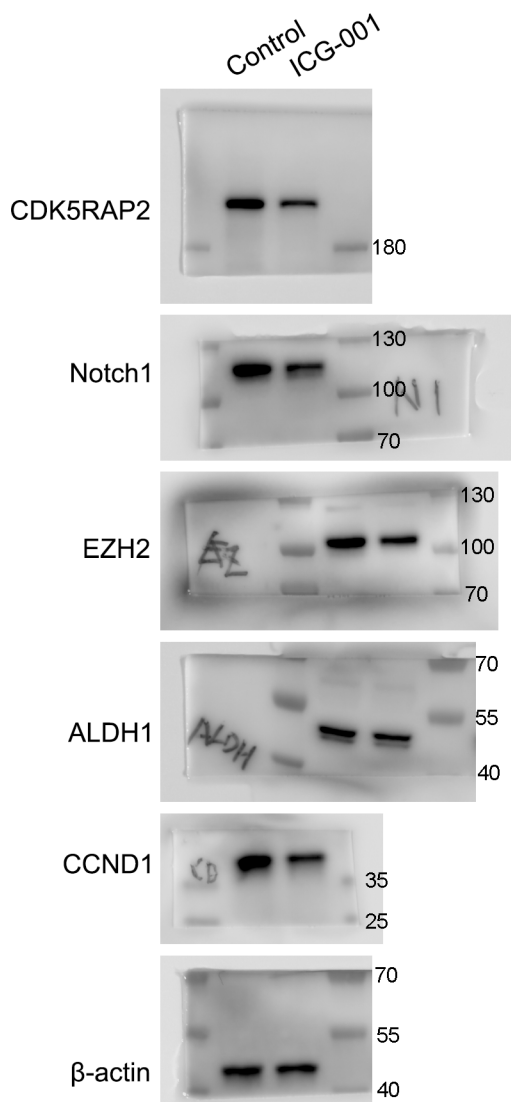

Original Western blots of Supplementary Figure 3

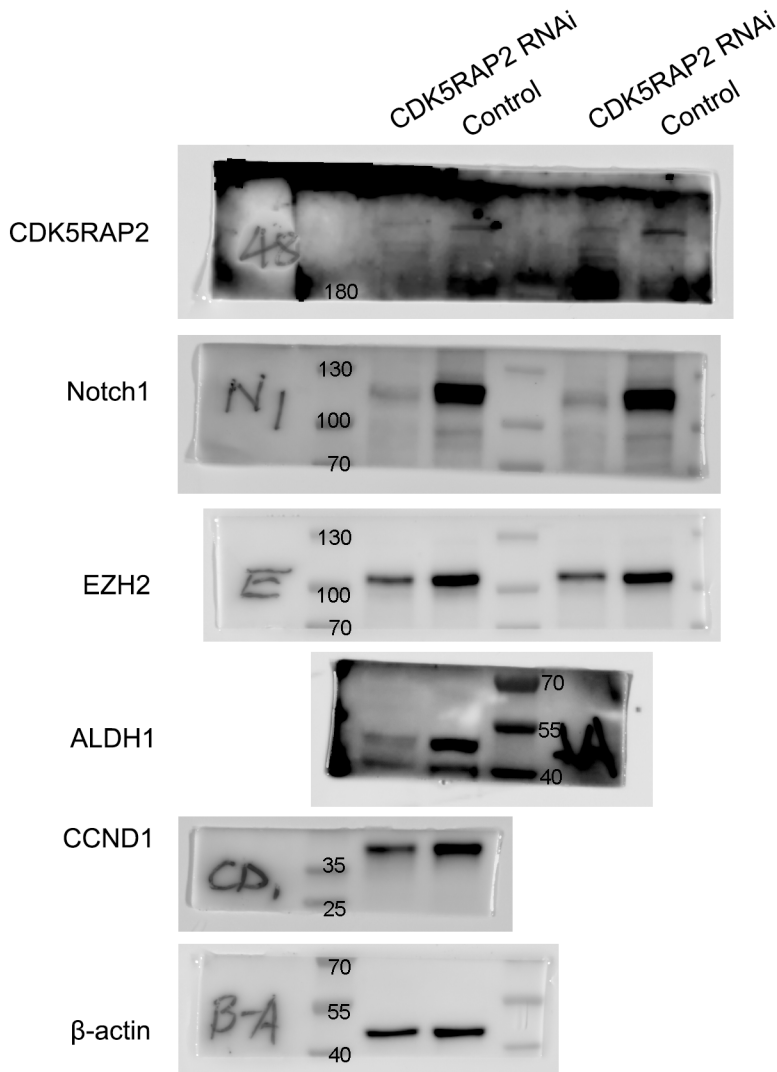

Supplement: 41419_2023_5652_MOESM2_ESM.pdf [file 41419_2023_5652_MOESM2_ESM.pdf]
